# Supplementary material
Source: PubMed Central journal article supplement (PMC5590821)
Supplement: NIHMS857718-supplement-suppdata-s2.pdf [file NIHMS857718-supplement-suppdata-s2.pdf]

## Supplementary material (SM)

### SM1 – Information about Sanger sequencing of *ACTG2* and *ACTA2*.

The genomic DNA was amplified by the polymerase chain reaction (PCR), the PCR products were sequencing using BigDyeTerminator Cycle Sequencing Kit and ABI 3500 xL sequencer (Applied Biosystems, Life Technologies Corporation), and the sequence analysis was accomplished by CodonCode Aligner V5.0.2. The primers used are listed in the table S1. They were designed using Gene Runner program V.3.05.

**TABLE S1 – Primers used in PCR and Sanger sequencing**

| <i>ACTG2</i><br>Exon | Primer forward            | Primer reverse          | Ta<br>(°C) | PCR<br>Size<br>(bp) |
|----------------------|---------------------------|-------------------------|------------|---------------------|
| 2                    | catttcagggcagagggag       | gtgtgcctgatgtatgttg     | 54.1       | 626                 |
| 3                    | cctccaccttctcttctg        | ggttgagaaaatggtcgtg     | 54.1       | 478                 |
| 4                    | ctgtaggagagtgaagaggagg    | cattattccacacccactcc    | 54.1       | 541                 |
| 5                    | agtgggtgtggaataatgaac     | gtgtatgtgtagaagctcctgg  | 54.1       | 469                 |
| 6                    | gattgatgattcttgtgatggg    | gatcttcactaccattcagcctg | 54.1       | 571                 |
| 7                    | gaataaagtagatgtgagaaggagg | cttgctacattgctgctac     | 54.1       | 585                 |
| 8                    | gcaacaatcgaagaagggtc      | gtcttcagccatcaatgc      | 54.1       | 455                 |
| 9                    | cacaatgccagccttac         | CCTTGACTTCTCTGAGCCTC    | 54.1       | 684                 |
| <i>ACTA2</i><br>Exon | Primer forward            | Primer reverse          | Ta<br>(°C) | PCR<br>Size<br>(bp) |
| 2                    | gatagcactaggacacagagg     | tggcatttactcctggacc     | 52,8       | 422                 |
| 3                    | gctatagtgatggacaagacagac  | cagttgagcaatgtgagcc     | 52,8       | 533                 |
| 4                    | ggtacttacacactttgagcttc   | gctgttctgtcctttggg      | 52,8       | 445                 |
| 5                    | ctgaacctcctactttggc       | ggagaggtgaggtgggac      | 58,8       | 480                 |
| 6                    | gtccacctcacctctcc         | gatgtgctttgctctgtgc     | 52,8       | 425                 |
| 7                    | ggcacatgtcttgaggagg       | cacccttgctaccctttcc     | 54,1       | 587                 |
| 8                    | gtcttcccagcctcagtc        | gaaagtagctgacagacaagg   | 54,1       | 531                 |
| 9                    | ccctctggcggctcctg         | ggaccactagaggagcc       | 52,8       | 565                 |

## **SM2 – Information about whole-exome sequencing**

The Agilent SureSelect Human All Exon V4 - 51Mb kit (Agilent Technologies, Santa Clara, CA) was used to capture the target regions. Genomic DNA (1 ug) was sheared using the Covaris E210 instrument (Covaris) followed by end repair, A-tailing and adapter ligation. A hybrid protocol for library preparation and whole exome enrichment was based on methods and parameters from Fisher et al. [2011] applied to the reagents, volumes and parameters from de Agilent SureSelect XT kit and automated protocol. The WES (paired end 100 bp reads) was performed on the patient 2 and her parents using the Illumina HiSeq2500 platform (Illumina, Inc. San Diego, CA). Each read was aligned to the 1000 genomes phase 2 (GRCh37) human genome reference using the Burrows–Wheeler Alignment (BWA) version 0.7.8 [Li H., 2013]. PCR duplicates were removed using the Picard software version 1.109. Local realignment around indels and base call quality score recalibration were performed using the Genome Analysis Toolkit (GATK) [McKenna et al., 2010] version 3.1-1-g07a4bf8. Variant filtering was done using the Variant Quality Score Recalibration (VQSR) method [DePristo et al., 2011]. SNVs and indels were filtered to obtain all variants up to the 99th percentile of truth sites (0,1% false negative rate). The phenoDB analysis tool was applied to filter and prioritize rare functional variants (missense, nonsense, splice site variants, and indels) [Sobreira et al., 2015].

**SM3 – Figure 1. Molecular analysis (DNA chromatograms) with identified pathogenic variants in the *ACTG2* (A, B, C and D) and *ACTA2* (E) - A: patient 3 (c.532C>T - p.Arg178Cys), B: patient 4 (c.770G>A - p.Arg257His), C: patient 5 (c.533G>T - p.Arg178Leu), D: patient 6 (c.584C>T - p.Thr195Ile) and E: patient 7 (c.535C>T - p.Arg179Cys). The variants were not identified in the evaluated parents.**

**SM4 – Pathogenicity of c.584C>T variant found in *ACTG2* (patient 6) predicted by different softwares**

Poly-Phen: possibly damaging (0.91).

Mutation Taster: disease (89).

Mutpred: probability of deleterious mutation: 0.78 (confident hypotheses).

Panther: disease (probability: 0,64).

Phd-SNP: disease (probability: 0,59).

Neutral variant: SNAP and SNPs&GO.

## SM5 - Information about the individuals with molecularly confirmed ACTG2-related disorders

TABLE SII. Summary of phenotype, genotype and family history data of individuals with molecularly confirmed ACTG2-related disorders

| Proband (P)                  | Number of individuals molecularly confirmed in the family | Phenotype     | Variant                  | Inheritance    | Onset (identification of symptoms) | Megacystis (time at diagnosis) | Voiding dysfunction (therapy) | Microcolon | Gastrointestinal dysfunction | Parenteral nutrition dependency | Prune-belly    |
|------------------------------|-----------------------------------------------------------|---------------|--------------------------|----------------|------------------------------------|--------------------------------|-------------------------------|------------|------------------------------|---------------------------------|----------------|
| <b>Lehtonen et al., 2012</b> |                                                           |               |                          |                |                                    |                                |                               |            |                              |                                 |                |
| P1                           | 8                                                         | CIPO          | c.442C>A:<br>p.Arg148Ser | familial       | 11y-20y                            | -                              | 1/8<br>(x)                    | -          | 8/8                          | 1/8<br>(intermittent)           | -              |
| <b>Holla et al., 2014</b>    |                                                           |               |                          |                |                                    |                                |                               |            |                              |                                 |                |
| P1                           | 1*                                                        | CIPO          | c.442C>A:<br>p.Arg148Ser | familial*      | adult                              | -                              | -                             | -          | +                            | +                               | (intermittent) |
| <b>Thorson et al., 2014</b>  |                                                           |               |                          |                |                                    |                                |                               |            |                              |                                 |                |
| P1                           | 1                                                         | MMIHS         | c.533G>T:<br>p.Arg178Leu | <i>de novo</i> | postnatal                          | +                              | +                             | -          | +                            | +                               | -              |
| P2                           | 1                                                         | MMIHS         | c.532C>T:<br>p.Arg178Cys | <i>de novo</i> | prenatal                           | +                              | +                             | +          | +                            | x                               | -              |
| <b>Wangler et al., 2014</b>  |                                                           |               |                          |                |                                    |                                |                               |            |                              |                                 |                |
| P1 (Fam4)                    | 1                                                         | MMIHS         | c.769C>T:<br>p.Arg257Cys | <i>de novo</i> | postnatal                          | +                              | +                             | -          | +                            | +                               | -              |
| P2 (Fam11)                   | 2                                                         | not specified | c.533G>A:<br>p.Arg178His | familial       | x                                  | x                              | x                             | x          | x                            | x                               | x              |
| P3 (Fam12)                   | 1                                                         | HVM           | c.119G>A:<br>p.Arg40His  | <i>de novo</i> | prenatal                           | +                              | +                             | -          | +                            | -                               | -              |
| P4 (Fam13)                   | 2                                                         | CIPO          | c.769C>T:<br>p.Arg257Cys | familial       | prenatal [1/2]                     | +                              | x                             | x          | 2/2                          | x                               | x              |
| P5 (Fam14)                   | 1                                                         | MMIHS         | c.134T>C:<br>p.Met45Thr  | <i>de novo</i> | postnatal                          | -                              | +                             | +          | +                            | +                               | (intermittent) |
| P6 (Fam16)                   | 1                                                         | MMIHS         | c.400T>A:<br>p.Tyr134Asn | <i>de novo</i> | prenatal                           | +                              | +                             | -          | +                            | +                               | +              |
| P7 (Fam17)                   | 1                                                         | not specified | c.187C>G:<br>p.Arg63Gly  | x              | x                                  | x                              | x                             | x          | x                            | x                               | x              |
| P8 (Fam19)                   | 2                                                         | CIPO          | c.330C>A:<br>p.Phe110Leu | familial       | x                                  | -                              | -                             | -          | 1/2                          | 2/2                             | -              |
| P9 (Fam25)                   | 1                                                         | MMIHS         | c.769C>T:<br>p.Arg257Cys | <i>de novo</i> | prenatal                           | +                              | +                             | +          | +                            | +                               | -              |
| P10 (Fam26)                  | 1                                                         | MMIHS         | c.118C>T:<br>p.Arg40Cys  | <i>de novo</i> | prenatal                           | +                              | +                             | +          | +                            | +                               | (intermittent) |
| P11 (Fam28)                  | 1                                                         | MMIHS         | c.593G>A:<br>p.Gly198Asp | <i>de novo</i> | postnatal                          | -                              | +                             | -          | +                            | +                               | -              |
| P12 (Fam29)                  | 1                                                         | MMIHS         | c.532C>T:<br>p.Arg178Cys | <i>de novo</i> | prenatal                           | +                              | +                             | +          | +                            | +                               | -              |

| Proband (P)                 | Number of individuals molecularly confirmed in the family | Phenotype             | Variant                           | Inheritance           | Onset (identification of symptoms) | Megacystis (time at diagnosis) | Voiding dysfunction (therapy) | Microcolon | Gastrointestinal dysfunction | Parenteral nutrition dependency | Prune-belly |
|-----------------------------|-----------------------------------------------------------|-----------------------|-----------------------------------|-----------------------|------------------------------------|--------------------------------|-------------------------------|------------|------------------------------|---------------------------------|-------------|
| P13 (Fam30)                 | 1                                                         | MMIHS                 | c.769C>T:<br>p.Arg257Cys          | <i>de novo</i>        | prenatal                           | +<br>(prenatal)                | +<br>(bladder cathet)         | -          | +                            | +                               | -           |
| P14 (Fam34)                 | 6                                                         | MMIHS [1]<br>CIPO [5] | c.119G>A:<br>p.Arg40His           | familial              | prenatal<br>[1/6]                  | 1/6<br>(prenatal)              | 1/6<br>(bladder cathet)       | -          | 6/6                          | -                               | -           |
| P15 (Fam35)                 | 1                                                         | MMIHS                 | c.533G>A:<br>p.Arg178His          | <i>de novo</i>        | prenatal                           | +<br>(prenatal)                | +<br>(bladder cathet)         | +          | +                            | +                               | -           |
| <b>Tuzovic et al., 2015</b> |                                                           |                       |                                   |                       |                                    |                                |                               |            |                              |                                 |             |
| P1                          | 2**                                                       | MMIHS                 | c.770G>A:<br>p.Arg257His          | gonadal<br>mosaicism? | 2/2<br>(prenatal)                  | 2/2<br>(prenatal)              | 2/2<br>(bladder cathet)       | 1/2        | 2/2                          | 1/2                             | -           |
| P2                          | 1                                                         | MMIHS                 | c.533G>A:<br>p.Arg178His          | <i>de novo</i>        | +<br>(prenatal)                    | +<br>(prenatal)                | +<br>(bladder cathet)         | +          | +                            | +                               | -           |
| P3                          | 1                                                         | MMIHS                 | c.769C>T:<br>p.Arg257Cys          | <i>de novo</i>        | +<br>(prenatal)                    | +<br>(prenatal)                | +<br>(bladder cathet)         | -          | +                            | +                               | -           |
| <b>Klar et al., 2015</b>    |                                                           |                       |                                   |                       |                                    |                                |                               |            |                              |                                 |             |
| P1                          | 7***                                                      | CIPO                  | c.806_807delinsAA:<br>p.Gly269Glu | familial              | 1m-16y                             | 7/7<br>(x)                     | 6/7<br>(x)                    | -          | 7/7                          | -                               | -           |
| <b>Halim et al., 2015</b>   |                                                           |                       |                                   |                       |                                    |                                |                               |            |                              |                                 |             |
| P1 (S1)                     | 1                                                         | MMIHS                 | c.187C>G:<br>p.Arg63Gln           | x                     | prenatal                           | +<br>(prenatal)                | x                             | +          | +                            | x                               | -           |
| P2 (S2)                     | 1                                                         | MMIHS                 | c.533G>A:<br>p.Arg178His          | <i>de novo</i>        | x                                  | +<br>(x)                       | x                             | +          | +                            | x                               | x           |
| P3 (S3)                     | 1                                                         | MMIHS                 | c.532C>T:<br>p.Arg178Cys          | <i>de novo</i>        | prenatal                           | +<br>(x)                       | x                             | +          | +                            | x                               | +           |
| P4 (S4)                     | 1                                                         | MMIHS                 | c.533G>A:<br>p.Arg178His          | x                     | prenatal                           | +<br>(prenatal)                | x                             | +          | +                            | x                               | -           |
| P5 (S5)                     | 1                                                         | MMIHS                 | c.533G>T:<br>p.Arg178Leu          | <i>de novo</i>        | prenatal                           | +<br>(prenatal)                | +<br>(bladder cathet)         | +          | +                            | x                               | -           |
| P6 (S6)                     | 1                                                         | MMIHS                 | c.118C>T:<br>p.Arg40Cys           | x                     | prenatal                           | +<br>(prenatal)                | x                             | +          | +                            | +<br>(partial)                  | -           |
| P7 (S7)                     | 1                                                         | MMIHS                 | c.532C>T:<br>p.Arg178Cys          | x                     | prenatal                           | +<br>(x)                       | x                             | +          | x                            | x                               | x           |
| P8 (S8)                     | 1                                                         | MMIHS                 | c.532C>T:<br>p.Arg178Cys          | x                     | prenatal                           | +<br>(x)                       | x                             | +          | x                            | x                               | x           |

bladder cathet: bladder catheterization; CIPO: chronic intestinal pseudo-obstruction; Fam: family – description based on original article; HVM: hollow visceral myopathy; m: months old; MMIHS: megacystis-microcolon-intestinal hypoperistalsis syndrome; S: sporadic case – description based on original article; y: years old; +: feature present; -: feature absent; x: unknown or not reported

\*: five affected individuals but only the proband was molecularly confirmed with ACTG2-related disorder; \*\* The hypothesis of gonadal mosaicism was considered in a family with two affected siblings and normal parents;

\*\*\* 12 affected individuals but only seven individuals were molecularly confirmed with ACTG2-related disorder

## REFERENCES

DePristo M, Banks E, Poplin R, Garimella K, Maguire J, Hartl C, Philippakis A, del Angel G, Rivas MA, Hanna M, McKenna A, Fennell T, Kernytsky A, Sivachenko A, Cibulskis K, Gabriel S, Altshuler D and Daly, M. 2011. A framework for variation discovery and genotyping using next-generation DNA sequencing data. *Nature Genetics* 43:491-498.

Fisher S, Barry A, Abreu J, Minie B, Nolan J, Delorey TM, Young G, Fennell TJ, Allen A, Ambrogio L, Berlin AM, Blumenstiel B, Cibulskis K, Friedrich D, Johnson R, Juhn F, Reilly B, Shamma R, Stalker J, Sykes SM, Thompson J, Walsh J, Zimmer A, Zwirko Z, Gabriel S, Nicol R, Nusbaum C. 2011. A scalable, fully automated process for construction of sequence-ready human exome targeted capture libraries. *Genome Biology* 12:R1.

Li H. 2013. Aligning sequence reads, clone sequences and assembly contigs with BWA-MEM. arXiv:1303.3997v1 [q-bio.GN].

McKenna A, Hanna M, Banks E, Sivachenko A, Cibulskis K, Kernytsky A, Garimella K, Altshuler D, Gabriel S, Daly M, DePristo MA. 2010. The Genome Analysis Toolkit: a MapReduce framework for analyzing next-generation DNA sequencing data. *Genome Res* 20:1297-1303.

Sobreira N, Schiettecatte F, Boehm C, Valle D, Hamosh A. 2015. *Hum Mutat* 36:425-431.
